# Supplementary material for: Platinum nanoparticles on 3D graphene-like zeolite-templated carbon for benzene hydrogenation
Source: Royal Society of Chemistry journal article supplement (doi:10.1039/d3cy00617d), 2023-01-01
Supplement: d3cy00617d1.pdf [file d3cy00617d1.pdf]

## SUPPLEMENTARY INFORMATION

### Platinum nanoparticles on 3D graphene-like zeolite-templated carbon for benzene hydrogenation

Somayeh F. Rastegar<sup>1</sup>, Radim Pilar<sup>1</sup>, Jaroslava Moravkova<sup>1</sup>, Galina Sadovska<sup>1,2</sup>, Vasile I. Parvulescu<sup>3</sup>,  
Jana Pastvova<sup>1</sup>, Jan Plsek<sup>1</sup>, Dalibor Kaucky<sup>1</sup>, Nikola Kostkova<sup>1,2</sup>, Petr Sazama<sup>1\*</sup>

<sup>1</sup>*J. Heyrovsky Institute of Physical Chemistry, Academy of Sciences of the Czech Republic, Dolejskova  
2155/3, 182 23 Prague, Czech Republic, \*Corresponding author: petr.sazama@jh-inst.cas.cz*

<sup>2</sup>*Faculty of Chemical Technology, University of Pardubice, Doubravice 41, 53210, Pardubice, Czech  
Republic*

<sup>3</sup>*University of Bucharest, Department of Organic Chemistry and Catalysis, B-dul Regina  
Elisabeta 4-12, 030016 Bucharest, Romania*

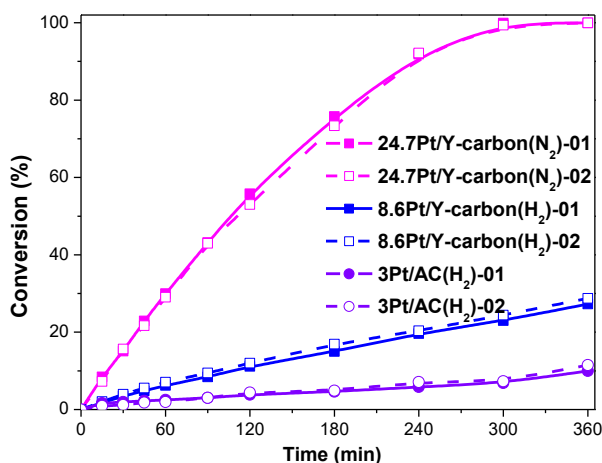

**Figure S1.** The reproducibility of catalytic measurements of hydrogenation of benzene to cyclohexane.

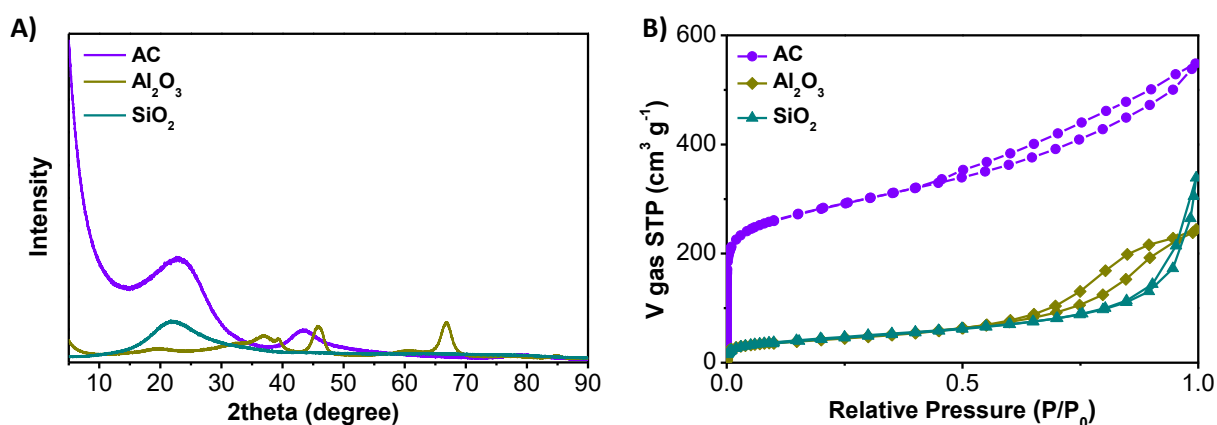

**Figure S2.** Characterization of catalyst supports used for the preparation of comparative Pt/catalysts. A) XRD analysis and B) N<sub>2</sub> adsorption at 77 K.

**Table S1.** Textural properties of alumina, silica and activated carbon supports used for the preparation of comparative Pt/catalysts obtained from N<sub>2</sub> adsorption/desorption at 77 K.

|                                | $V_{\text{micro}}$<br>$\text{cm}^3 \text{g}^{-1}$ | $V_{\text{meso}}$<br>$\text{cm}^3 \text{g}^{-1}$ | $V_{\text{tot}}$<br>$\text{cm}^3 \text{g}^{-1}$ | $S_{\text{tot}}$<br>$\text{m}^2 \text{g}^{-1}$ |
|--------------------------------|---------------------------------------------------|--------------------------------------------------|-------------------------------------------------|------------------------------------------------|
| AC                             | 0.44                                              | 0.43                                             | 0.87                                            | 1031                                           |
| Al <sub>2</sub> O <sub>3</sub> | 0.04                                              | 0.30                                             | 0.34                                            | 153                                            |
| SiO <sub>2</sub>               | 0.04                                              | 0.11                                             | 0.15                                            | 161                                            |

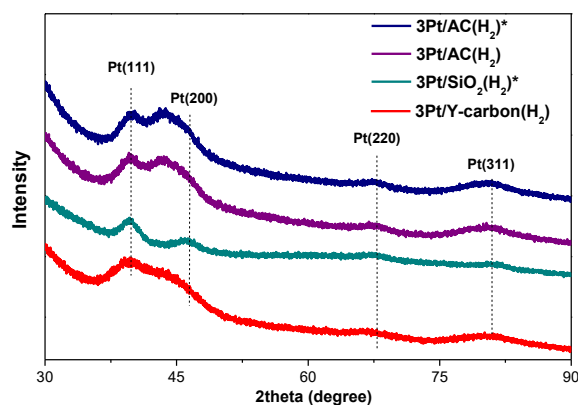

**Figure S3.** XRD analysis of 3Pt/catalysts with characteristic lines of metal platinum.

**Table S2.** Repeated use of Pt/Y-carbon catalysts in the hydrogenation of benzene carried out in a pressure batch reactor at a temperature of 100 °C and a pressure of 10 bar with *n*-heptane as a solvent. The catalysts were reused without any treatment or activation between catalytic runs.

| Catalyst                        | Catalyst productivity at 180 min<br>$\text{mol g}_{\text{cat}}^{-1} \text{s}^{-1}$ |                                    |                                    |
|---------------------------------|------------------------------------------------------------------------------------|------------------------------------|------------------------------------|
|                                 | 1 <sup>st</sup> Run, fresh catalysts                                               | 2 <sup>nd</sup> Run, used catalyst | 3 <sup>rd</sup> Run, used catalyst |
| 8.6Pt/Y-carbon( $\text{H}_2$ )  | $1.87 \cdot 10^{-4}$                                                               | $1.92 \cdot 10^{-4}$               | $1.01 \cdot 10^{-4}$               |
| 24.7Pt/Y-carbon( $\text{N}_2$ ) | $1.42 \cdot 10^{-3}$                                                               | $1.36 \cdot 10^{-3}$               | $1.11 \cdot 10^{-3}$               |

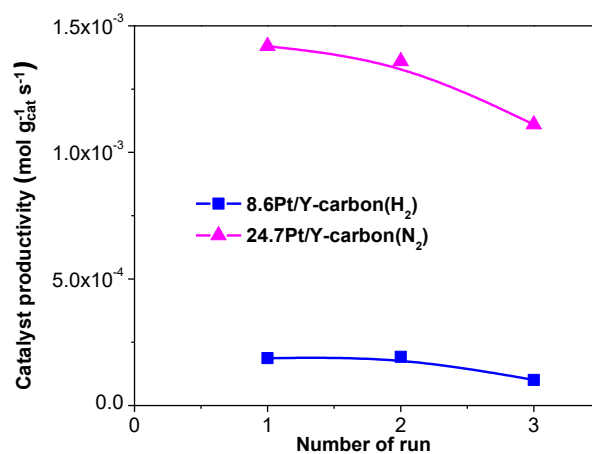

**Figure S4.** Catalyst productivity in the hydrogenation of benzene at a temperature of 100 °C and a pressure of 10 bar with *n*-heptane as a solvent for fresh and repeatedly used catalyst.

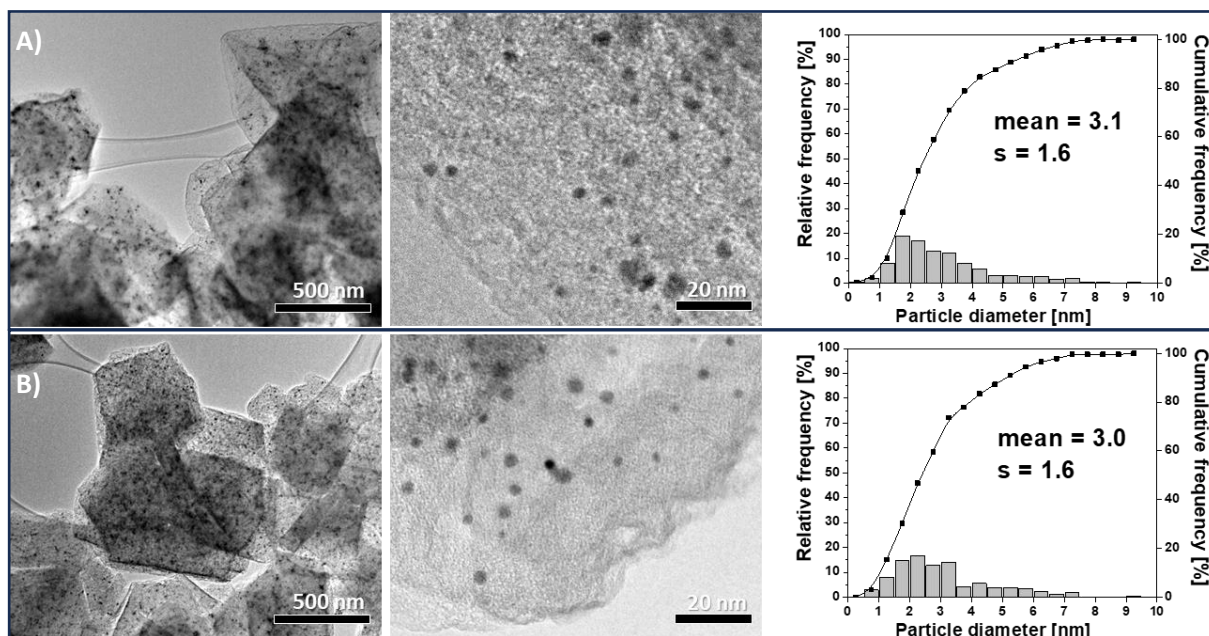

**Figure S5.** HR-TEM analysis of 8.6Pt/Y-carbon( $H_2$ ) A) before and B) after three subsequent catalytic tests in the hydrogenation of benzene.

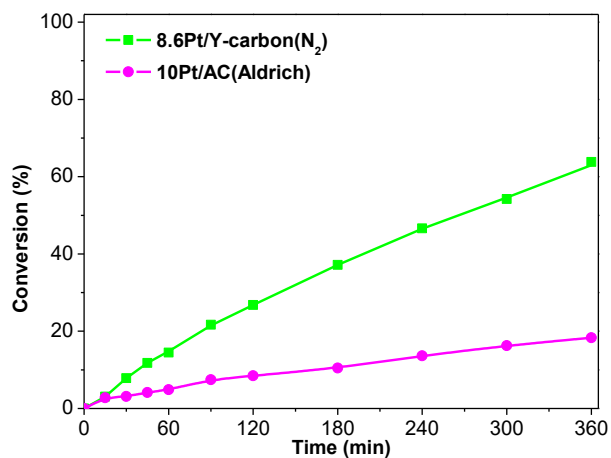

**Figure S6.** Comparison of benzene to cyclohexane conversions in the benzene hydrogenation for 8.6Pt/Y-carbon( $N_2$ ) and a commercial 10Pt/AC catalyst (Aldrich, PN 205958, Lot. MKCM3796) with 10 wt.% Pt deposited on activated carbon.

**Table S3.** Comparison of the productivity of Pt/Y-carbon(N<sub>2</sub>) catalysts with reported Pt-catalysts for benzene hydrogenation.

| Catalyst                              | Catalyst productivity<br>mol g <sub>cat</sub> <sup>-1</sup> s <sup>-1</sup> | Conditions of the catalytic test                                      | Ref.       |
|---------------------------------------|-----------------------------------------------------------------------------|-----------------------------------------------------------------------|------------|
| 24.7Pt/Y-carbon(N <sub>2</sub> )      | 10.6·10 <sup>-4</sup>                                                       | batch/(l); 100 °C; 10 bar                                             | This study |
| 8.6Pt/Y-carbon(N <sub>2</sub> )       | 4.8·10 <sup>-4</sup>                                                        | batch/(l); 100 °C; 10 bar                                             | This study |
| 3Pt/Y-carbon(N <sub>2</sub> )         | 1.4·10 <sup>-4</sup>                                                        | batch/(l); 100 °C; 10 bar                                             | This study |
| 10Pt/AC(Aldrich)                      | 1.6·10 <sup>-4</sup>                                                        | batch/(l); 100 °C; 10 bar                                             | This study |
| 10Pt/Al <sub>2</sub> O <sub>3</sub>   | 3.72·10 <sup>-5</sup>                                                       | flow/(g); 80 °C; H <sub>2</sub> /B=5; 1 ml/s                          | 1          |
| 0.34Pt/Al <sub>2</sub> O <sub>3</sub> | 1.24·10 <sup>-5</sup>                                                       | flow/(g); 80 °C H <sub>2</sub> /B=692/68 Torr                         | 2          |
| 1.91Pt/SiO <sub>2</sub>               | 2.15·10 <sup>-5</sup>                                                       | flow/(g); 80 °C H <sub>2</sub> /B=692/68 Torr                         | 2          |
| 0.5Pt/MOR                             | 6.11·10 <sup>-7</sup>                                                       | flow/(g); 80 °C; H <sub>2</sub> /B=9; 1 bar; WHSV=8.8 h <sup>-1</sup> | 3          |
| 0.5Pt/USY                             | 6.67·10 <sup>-6</sup>                                                       | flow/(g); 80 °C; H <sub>2</sub> /B=9; 1 bar; WHSV=8.8 h <sup>-1</sup> | 3          |
| 11Pt/SWCNT                            | 6.33·10 <sup>-5</sup>                                                       | batch/(l); 20 °C; 22.5 mmol of benzene; 10 bar                        | 4          |
| 10Pt/AC                               | 1.38·10 <sup>-5</sup>                                                       | batch/(l); 20 °C; 22.5 mmol of benzene; 10 bar                        | 4          |
| 0.96Pt/SiO <sub>2</sub>               | 3.80·10 <sup>-6</sup>                                                       | flow/(g); 60°C; H <sub>2</sub> /B=1.01 bar/0.05 bar                   | 5          |
| 0.78Pt/Al <sub>2</sub> O <sub>3</sub> | 1.43·10 <sup>-6</sup>                                                       | flow/(g); 60°C; H <sub>2</sub> /B=1.01 bar/0.05 bar                   | 5          |
| 0.95Pt/TiO <sub>2</sub>               | 4.97·10 <sup>-6</sup>                                                       | flow/(g); 60°C; H <sub>2</sub> /B=1.01 bar/0.05 bar                   | 5          |

SWCNT - single-walled carbon nanotubes

AC – activated carbon

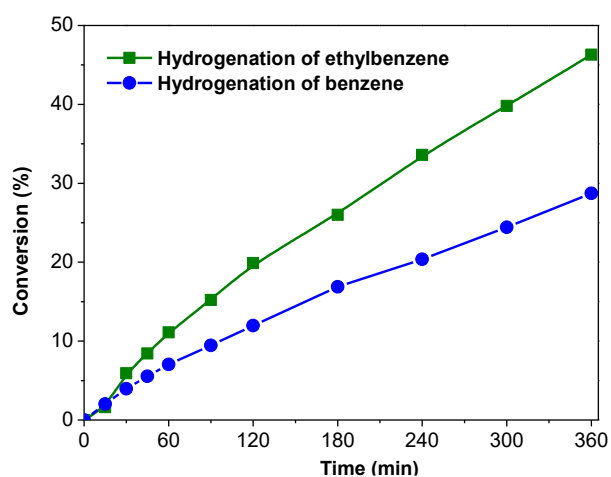

**Figure S7.** Comparison of the catalytic activity of 8.6Pt/Y-carbon( $H_2$ ) in the hydrogenation of benzene and ethylbenzene under identical conditions (10 bar  $H_2$ , 100 °C, 10 mg catalyst).

#### References

1. J. Lee, E. J. Jang and J. H. Kwak, *Appl Catal a-Gen*, 2019, **569**, 8-19.
2. A. F. Flores, R. L. Burwell and J. B. Butt, *J. Chem. Soc.-Faraday Trans.*, 1992, **88**, 1191-1196.
3. V. Fouche, P. Magnoux and M. Guisnet, *Appl Catal*, 1990, **58**, 189-198.
4. Y. J. Liao, H. B. Pan and C. M. Wai, *J Nanosci Nanotechno*, 2011, **11**, 8580-8585.
5. S. D. Lin and M. A. Vannice, *J Catal*, 1993, **143**, 539-553.
